# Supplementary material for: Trends in sports-related emergency department visits in the Netherlands, 2009–2018
Source: PubMed Central journal article supplement — BMJ Open Sport Exerc Med. 2020 Oct 14;6(1):e000811. doi: 10.1136/bmjsem-2020-000811 (PMC7640740; doi:10.1136/bmjsem-2020-000811), 2020-10-14
Supplement: bmjsem-2020-000811s001.pdf [file bmjsem-2020-000811s001.pdf]

**Table S1** Injury diagnosis classification (MAIS)

| Injury diagnosis                                   | MAIS=1<br>(minor injury) | MAIS≥2<br>(severe injury) |
|----------------------------------------------------|--------------------------|---------------------------|
| (Mild) traumatic brain injury                      |                          | x                         |
| Other skull/brain                                  |                          | x                         |
| Open wound head                                    | x                        |                           |
| Eye injury                                         | x                        |                           |
| Fractured face                                     | x                        | x                         |
| Open wound face                                    | x                        |                           |
| Fracture/luxation/distortion spine                 |                          | x                         |
| Whiplash                                           | x                        |                           |
| Spinal cord injury                                 |                          | x                         |
| Internal organs injury                             |                          | x                         |
| Fractured ribs/chest                               |                          | x                         |
| Fractured collarbone/shoulder                      |                          | x                         |
| Fractured upper arm                                |                          | x                         |
| Fractured elbow/forearm                            |                          | x                         |
| Fractured wrist                                    |                          | x                         |
| Fractured hand/fingers <sup>1</sup>                | x                        | x                         |
| Shoulder/elbow <sup>2</sup><br>luxation/distortion | x                        | x                         |
| Wrist/hand/fingers<br>luxation/distortion          | x                        |                           |
| Peripheral nerve arm/hand                          | x                        |                           |
| Complex arm/hand                                   |                          | x                         |
| Fractured pelvis                                   |                          | x                         |
| Fractured hip                                      |                          | x                         |
| Fractured thigh                                    |                          | x                         |
| Fractured knee/lower leg                           |                          | x                         |
| Fractured ankle                                    |                          | x                         |
| Fractured foot/toes <sup>3</sup>                   | x                        | x                         |
| Knee luxation/distortion                           |                          | x                         |
| Ankle/foot luxation/distortion                     | x                        |                           |
| Hip luxation/distortion                            |                          | x                         |
| Peripheral nerve leg/foot                          | x                        |                           |
| Complex leg/foot                                   |                          | x                         |
| Superficial injury                                 | x                        |                           |
| Open wound                                         | x                        |                           |
| Burn                                               | x                        |                           |
| Intoxication                                       | x                        |                           |
| Polytrauma                                         |                          | x                         |
| Foreign body                                       | x                        |                           |
| No injury after examination                        | x                        |                           |
| Other injury                                       | x                        |                           |

<sup>1</sup> Fractured hand: MAIS≥2; fractured finger: MAIS=1.

<sup>2</sup> Shoulder luxation/distortion: MAIS≥2; elbow luxation/distortion: MAIS=1.

<sup>3</sup> Fractured foot: MAIS≥2; fractured toe: MAIS=1.

**Table S2** All sports activities coded in DISS database

---

| Number | Sports activity      | Number | Sports activity      |
|--------|----------------------|--------|----------------------|
| 1.     | Air sports           | 34.    | Ice hockey           |
| 2.     | American football    | 35.    | Ice sailing          |
| 3.     | Archery              | 36.    | Ice skating          |
| 4.     | Athletics            | 37.    | Inline skating       |
| 5.     | Badminton            | 38.    | Karting              |
| 6.     | Ballet               | 39.    | Korfball             |
| 7.     | Baseball             | 40.    | Motorcycle racing    |
| 8.     | Basketball           | 41.    | Motorsports          |
| 9.     | Beach volleyball     | 42.    | Mountain bike racing |
| 10.    | Billiards            | 43.    | Parachuting          |
| 11.    | BMX                  | 44.    | Physical education   |
| 12.    | Bodybuilding         | 45.    | Road cycle racing    |
| 13.    | Bowling              | 46.    | Roller skating       |
| 14.    | Boxing               | 47.    | Rowing               |
| 15.    | Canoeing             | 48.    | Rugby                |
| 16.    | Climbing             | 49.    | Running              |
| 17.    | Combat sports        | 50.    | Sailing              |
| 18.    | Cricket              | 51.    | Shooting sports      |
| 19.    | Cross-country skiing | 52.    | Skateboarding        |
| 20.    | Darts                | 53.    | Skiing               |
| 21.    | Dog sports           | 54.    | Snowboarding         |
| 22.    | Fencing              | 55.    | Softball             |
| 23.    | Field hockey         | 56.    | Squash               |
| 24.    | Fierljeppen          | 57.    | Swimming             |
| 25.    | Fishing              | 58.    | Table tennis         |
| 26.    | Fitness              | 59.    | Tennis               |
| 27.    | Soccer               | 60.    | Trampolining         |
| 28.    | Free running         | 61.    | Volleyball           |
| 29.    | Futsal               | 62.    | Water polo           |
| 30.    | Golf                 | 63.    | Water skiing         |
| 31.    | Gymnastics           | 64.    | Windsurfing          |
| 32.    | Handball             | 65.    | Wrestling            |
| 33.    | Horse riding         |        |                      |

---

**Table S3** Absolute number and 95% confidence interval of severe sports-related Emergency Department visits in the Netherlands (2009-2018), by sports activity (11-21)

|               | 2009                 | 2010                 | 2011                 | 2012                 | 2013                 | 2014                 | 2015                 | 2016                 | 2017                 | 2018                 |
|---------------|----------------------|----------------------|----------------------|----------------------|----------------------|----------------------|----------------------|----------------------|----------------------|----------------------|
| Combat sports | 1,300<br>(700-2,100) | 1,200<br>(700-2,000) | 1,300<br>(700-2,100) | 1,400<br>(800-2,200) | 1,300<br>(700-2,100) | 1,100<br>(600-1,900) | 1,000<br>(500-1,700) | 1,200<br>(600-1,800) | 1,200<br>(700-1,900) | 1,200<br>(700-1,900) |
| Swimming      | 1,300<br>(700-2,000) | 1,000<br>(500-1,700) | 1,100<br>(600-1,900) | 1,000<br>(500-1,700) | 1,600<br>(900-2,400) | 1,100<br>(600-1,800) | 1,300<br>(700-2,000) | 1,200<br>(700-1,900) | 1,200<br>(700-900)   | 1,300<br>(700-2,000) |
| Tennis        | 1,200<br>(700-2,000) | 1,100<br>(500-1,700) | 1,100<br>(600-1,900) | 1,200<br>(600-1,900) | 1,100<br>(500-1,800) | 900<br>(400-1,500)   | 800<br>(400-1,400)   | 700<br>(300-1,300)   | 800<br>(400-1,300)   | 800<br>(400-1,400)   |
| Futsal        | 1,400<br>(800-2,200) | 1,200<br>(700-2,000) | 1,200<br>(600-2,000) | 1,200<br>(700-2,000) | 1,000<br>(500-1,700) | 900<br>(400-1,500)   | 600<br>(200-1,200)   | 600<br>(200-1,100)   | 700<br>(300-1,200)   | 500<br>(200-1,000)   |
| Skiing        | 1,200<br>(600-1,900) | 1,000<br>(500-1,600) | 1,000<br>(500-1,700) | 800<br>(400-1,500)   | 800<br>(300-1,400)   | 700<br>(300-1,300)   | 800<br>(400-1,400)   | 800<br>(400-1,400)   | 800<br>(400-1,400)   | 1,100<br>(600-1,700) |
| Volleyball    | 900<br>(500-1,600)   | 900<br>(400-1,500)   | 1,000<br>(500-1,700) | 1,000<br>(500-1,700) | 900<br>(500-1,600)   | 700<br>(300-1,300)   | 700<br>(300-1,300)   | 700<br>(300-1,200)   | 800<br>(400-1,300)   | 800<br>(400-1,400)   |
| Skateboarding | 800<br>(300-1,400)   | 900<br>(500-1,600)   | 700<br>(300-1,200)   | 600<br>(300-1,200)   | 800<br>(300-1,400)   | 1,000<br>(500-1,700) | 900<br>(400-1,600)   | 900<br>(500-1,500)   | 700<br>(300-1,200)   | 1,000<br>(500-1,600) |
| Running       | 600<br>(300-1,200)   | 600<br>(200-1,100)   | 700<br>(300-1,300)   | 700<br>(300-1,300)   | 700<br>(300-1,300)   | 1,000<br>(500-1,700) | 1,000<br>(500-1,700) | 900<br>(500-1,500)   | 800<br>(400-1,400)   | 700<br>(300-1,200)   |
| Basketball    | 800<br>(300-1,400)   | 600<br>(200-1,200)   | 700<br>(300-1,300)   | 900<br>(400-1,500)   | 700<br>(300-1,300)   | 500<br>(200-1,100)   | 600<br>(200-1,100)   | 600<br>(200-1,100)   | 700<br>(300-1,300)   | 600<br>(300-1,200)   |
| Snowboarding  | 700<br>(300-1,300)   | 800<br>(400-1,400)   | 700<br>(300-1,400)   | 600<br>(200-1,200)   | 400<br>(100-900)     | 600<br>(200-1,100)   | 600<br>(200-1,100)   | 600<br>(200-1,100)   | 500<br>(200-1,000)   | 600<br>(200-1,000)   |
| Fitness       | 400<br>(100-900)     | 400<br>(100-900)     | 400<br>(<100-800)    | 500<br>(200-1,000)   | 600<br>(200-1,100)   | 500<br>(200-1,100)   | 600<br>(200-1,100)   | 500<br>(200-1,000)   | 600<br>(200-1,100)   | 800<br>(400-1,400)   |

**Table S4** Absolute number and 95% confidence interval of severe sports-related Emergency Department visits in the Netherlands (2009-2018), by injury diagnosis (11-21)

|                                    | 2009                 | 2010                 | 2011                 | 2012                   | 2013                 | 2014                 | 2015                   | 2016                   | 2017                   | 2018                   |
|------------------------------------|----------------------|----------------------|----------------------|------------------------|----------------------|----------------------|------------------------|------------------------|------------------------|------------------------|
| Fractured upper arm                | 1,500<br>(800-2,300) | 1,200<br>(700-2,000) | 1,400<br>(800-2,200) | 1,700<br>(1,000-2,600) | 1,200<br>(600-1,900) | 1,300<br>(700-2,100) | 1,800<br>(1,100-2,700) | 1,700<br>(1,100-2,600) | 2,000<br>(1,300-2,800) | 1,500<br>(900-2,300)   |
| Muscle/tendon injury hand/finger   | 700<br>(300-1,300)   | 700<br>(300-1,200)   | 800<br>(400-1,400)   | 900<br>(400-1,600)     | 900<br>(400-1,500)   | 1,100<br>(500-1,800) | 1,100<br>(600-1,800)   | 1,600<br>(900-2,400)   | 2,600<br>(1,800-3,600) | 1,900<br>(1,200-2,700) |
| Knee luxation                      | 900<br>(400-1,500)   | 800<br>(400-1,400)   | 1,000<br>(500-1,700) | 1,200<br>(600-1,900)   | 900<br>(400-1,500)   | 1,200<br>(600-1,900) | 1,100<br>(600-1,800)   | 1,100<br>(600-1,800)   | 1,200<br>(700-1,900)   | 1,000<br>(500-1,600)   |
| Fractured spine/spinal cord injury | 700<br>(300-1,300)   | 600<br>(200-1,100)   | 800<br>(400-1,500)   | 1,000<br>(500-1,700)   | 800<br>(400-1,500)   | 800<br>(400-1,500)   | 900<br>(400-1,600)     | 800<br>(400-1,400)     | 900<br>(400-1,400)     | 1,000<br>(500-1,600)   |
| Fractured knee                     | 700<br>(300-1,300)   | 500<br>(200-1,100)   | 600<br>(200-1,100)   | 700<br>(300-1,300)     | 700<br>(300-1,200)   | 700<br>(300-1,200)   | 700<br>(300-1,200)     | 600<br>(300-1,200)     | 600<br>(200-1,100)     | 800<br>(400-1,400)     |
| Fractured ribs/chest               | 700<br>(300-1,200)   | 500<br>(200-1,000)   | 600<br>(200-1,200)   | 700<br>(300-1,200)     | 700<br>(300-1,300)   | 700<br>(300-1,200)   | 700<br>(300-1,200)     | 600<br>(300-1,200)     | 700<br>(300-1,200)     | 600<br>(200-1,100)     |
| Fractured hip                      | 700<br>(300-1,300)   | 500<br>(200-1,000)   | 400<br>(<100-800)    | 1,000<br>(500-1,700)   | 500<br>(200-1,100)   | 400<br>(100-900)     | 700<br>(300-1,200)     | 500<br>(200-1,000)     | 700<br>(300-1,200)     | 900<br>(400-1,500)     |
| Muscle/tendon injury lower leg     | 1,100<br>(600-1,800) | 900<br>(500-1,600)   | 700<br>(300-1,300)   | 800<br>(300-1,400)     | 500<br>(200-1,100)   | 500<br>(200-1,000)   | 300<br>(<100-700)      | 400<br>(100-800)       | 300<br>(<100-600)      | 200<br>(<100-600)      |
| Severe traumatic brain injury      | 300<br>(<100-700)    | 300<br>(<100-700)    | 600<br>(200-1,100)   | 700<br>(300-1,300)     | 700<br>(300-1,200)   | 500<br>(200-1,100)   | 400<br>(100-900)       | 500<br>(200-1,000)     | 500<br>(200-1,000)     | 600<br>(300-1,100)     |
| Fractured pelvis                   | 300<br>(<100-700)    | 200<br>(<100-600)    | 300<br>(<100-700)    | 400<br>(<100-800)      | 300<br>(<100-700)    | 300<br>(<100-700)    | 300<br>(<100-700)      | 300<br>(<100-700)      | 500<br>(200-900)       | 500<br>(200-1,000)     |
| Fractured thigh                    | 300<br>(<100-700)    | 200<br>(<100-600)    | 300<br>(<100-700)    | 300<br>(<100-700)      | 200<br>(<100-600)    | 200<br>(<100-600)    | 200<br>(<100-600)      | 300<br>(<100-600)      | 300<br>(<100-700)      | 300<br>(<100-600)      |
